# Persistent Infections by Nontyphoidal *Salmonella* in Humans: Epidemiology and Genetics

Alex Marzel,<sup>1,2,a</sup> Prerak T. Desai,<sup>3</sup> Alina Goren,<sup>1,4</sup> Yosef Ilan Schorr,<sup>5</sup> Israel Nissan,<sup>5</sup> Steffen Porwollik,<sup>3</sup> Lea Valinsky,<sup>5</sup> Michael McClelland,<sup>3</sup> Galia Rahav,<sup>1,6</sup> and Ohad Gal-Mor<sup>1,4</sup>

<sup>1</sup>Infectious Diseases Research Laboratory, Sheba Medical Center, Tel-Hashomer, <sup>2</sup>Department of Epidemiology and Preventive Medicine, Sackler Faculty of Medicine, Tel Aviv University, Israel; <sup>3</sup>Department of Microbiology and Molecular Genetics, University of California, Irvine; <sup>4</sup>Department of Clinical Microbiology and Immunology, Sackler Faculty of Medicine, Tel Aviv University, <sup>5</sup>Ministry of Health Central Laboratories, Jerusalem, and <sup>6</sup>Sackler Faculty of Medicine, Tel Aviv University, Israel

**Background.** Although chronic infections by typhoidal *Salmonella* are well-known, prolonged human infections by nontyphoidal *Salmonella* (NTS) are poorly characterized.

**Methods.** We retrospectively analyzed 48 345 culture-confirmed NTS infections that occurred in Israel 1995–2012. A case-control study was performed to identify risk factors associated with persistent infections. Whole-genome-sequencing, pulsed-field gel electrophoresis (PFGE), and a mouse infection model were used to study genetic and phenotypic differences between same-patient persistent, recurring isolates.

**Results.** In total, 1047 cases of persistent NTS infections, comprising 2.2% of all reported cases of salmonellosis, were identified. The persistence periods ranged between 30 days to 8.3 years. The majority (93%) of the persistently infected patients were immunocompetent, and 65% were symptomatic with relapsing diarrhea, indicating a distinct clinical manifestation from the asymptomatic carriage of typhoidal *Salmonella*. Four NTS serovars (Mbandaka, Bredeney, Infantis and Virchow) were found to be significantly more frequently associated with persistence than others. Comparative genomics between early and later isolates obtained from the same patients confirmed clonal infection and showed 0 to 10 SNPs between persistent isolates. A different composition of mobile genetic elements (plasmids and phages) or amino acid substitutions in global regulators was identified in multiple cases. These changes resulted in differences in phenotype and virulence between early and later same-patient isolates.

**Conclusions.** These results illuminate the overlooked clinical manifestation of persistent salmonellosis that can serve as a human reservoir for NTS infections. Additionally, we demonstrate mechanisms of in-host microevolution and exhibit their potential to shape *Salmonella* pathogenicity, antimicrobial resistance and host-pathogen interactions.

**Keywords.** *Salmonella enterica*; salmonellosis; persistent infection; WGS; epidemiology.

*Salmonella enterica* is a Gram-negative, facultatively intracellular human and animal pathogen posing a major public health concern worldwide [1]. The species *S. enterica* includes more than 2600 serovars, which are taxonomically classified into 6 subspecies, sharing high sequence similarity [2,3]. Subspecies I serovars are divided into 2 clinically relevant groups according to the disease they cause. Infections with the human-restricted *S. Typhi*, *S. Paratyphi A* and *B*, and *S. Sendai* elicit an invasive, life-threatening systemic disease referred to as typhoid or enteric fever [4]. On the other hand, nontyphoidal serovars (NTS) normally cause self-limited gastroenteritis, associated with intestinal inflammation and diarrhea that lasts for 5–7 days, in immunocompetent individuals [5].

*Salmonella* are excreted in the feces of infected animals and people during the course of the disease but may also endure during convalescence. In sum, 1%–4% of individuals infected with *S. Typhi* become asymptomatic chronic carriers that continue to excrete the pathogen for more than 12 months [4]. Long-term carriage of *S. Paratyphi* is less characterized than *S. Typhi*, but a recent study in Nepal suggests a similar prevalence of persistence for serovars *Typhi* and *Paratyphi A* in endemic regions [6].

In contrast to the well-documented cases of prolonged infections by *S. Typhi*, persistent NTS infections are far less studied and the prevalence of long-term NTS carriers in the population is not known. Here, we integrated epidemiological, microbiological and genomics approaches to demonstrate that at least 2.2% of all confirmed NTS infections in Israel result in prolonged infection. Moreover, we show genetic and phenotypic changes between related isolates obtained from the same patients over the course of the infection. We further show that these differences can alter virulence-associated phenotypes in vitro and *Salmonella* pathogenicity in vivo, using the colitis mouse model.

Received 9 September 2015; accepted 22 December 2015; published online 5 January 2016.

<sup>a</sup>Present address: Division of Infectious Diseases and Hospital Epidemiology, University Hospital Zurich, University of Zurich, Switzerland.

Correspondence: O. Gal-Mor, Infectious Diseases Research Laboratory, Sheba Medical Center, Tel-Hashomer, Israel (ohad.gal-mor@sheba.health.gov.il).

**Clinical Infectious Diseases**® 2016;62(7):879–86

© The Author 2016. Published by Oxford University Press for the Infectious Diseases Society of America. All rights reserved. For permissions, e-mail journals.permissions@oup.com. DOI: 10.1093/cid/civ1221

## MATERIALS AND METHODS

### Study Population

Salmonellosis is a notifiable disease in Israel by law. All microbiology laboratories countrywide are required to submit *Salmonella* isolates from all sources to the national *Salmonella* reference center (NSRC), where serological identification is performed according to the Kauffmann–White–Le–Minor scheme [7]. All the serotyped isolates, their source, sending laboratory, date of isolation and patient identification number (ID) are routinely documented [8]. In this study we analyzed 48 345 cases of NTS infections reported to the NSRC between 1995 and 2012. The minimal duration of infection for each case was calculated, based on the number of days between the first and the last submitted culture, if the same-patient samples were of the same serovar.

### A Case-control Study

The case-control study included telephone interviews with 103 NTS persistent patients (cases, from which 2 or more *Salmonella* samples of the same serovar had been submitted with a minimal interval of 30 days) and 135 randomly chosen nonmatched controls from 2011 to 2012, that submitted a single stool sample (see [Supplementary Text](#)). All interviewees answered a standardized questionnaire addressing demographic details, health condition and background diseases, the course of the disease and the treatment they received (including antibiotic treatment before or during the infection), and whether other pathogens were isolated as well.

### Statistical Analysis

Statistical analyses were performed with R (v 3.0.3). Multinomial logistic regression was performed for the multivariable analysis (see [Supplementary Text](#)).

### Pulsed-field Gel Electrophoresis (PFGE)

PFGE was performed according to the Pulsenet International Standardized Protocol [9] using *Xba*I endonuclease.

### Whole Genome Sequencing (WGS) Bioinformatics and Phylogeny

Whole genome shotgun assemblies for 11 pairs of persistent *S. Typhimurium* isolates were generated at Expression Analysis (Durham, NC) using 50 cycles of Illumina's paired end chemistry to a depth of approximately 175-fold coverage and assembled using Velvet [10]. Maximum likelihood tree was constructed using RAxML [11] with 100 replications. See [Supplementary Text](#) for bioinformatical workflow. All the sequences were deposited into the NCBI Sequence Read Archive (SRA) under accession numbers: SRS1190306, SRS1190305, SRS1190304, SRS1190303, SRS1190300, SRS1190301, SRS1190299, SRS1190298, SRS1190297, SRS1190296, SRS1190295, SRS1190294, SRS1190293, SRS1190290, SRS1190289, SRS1190284, SRS1190283, SRS1190282, SRS1190281, SRS1190280, SRS1190279, and SRS1190278.

### Virulence-associated Phenotypes Comparison

Intra-macrophage survival, motility, biofilm formation, and growth assays were performed as described in the [Supplementary Text](#).

### Mouse Infection

Mouse competitive index experiments were conducted using Female C3H/HeNHsd mice infected at an age of 7–8 weeks. Streptomycin (20 mg per mouse) was given by oral gavage 24 hours prior to the infection. Early and later isolates obtained from the same patients harboring pWSK129 (Km<sup>r</sup>) and pWSK29 (Amp<sup>r</sup>), respectively, were grown in Luria broth (LB) with the appropriate antibiotics for 16 hours and diluted in saline. 0.2 mL containing equal numbers ( $5 \times 10^6$ – $1 \times 10^7$  colony-forming units [CFU]) of each isolate was administered orally. At day 4 post infection, mice were sacrificed, and the bacterial load was enumerated. The competitive index (C.I.) was calculated as  $[\text{later isolate (Amp}^r\text{)} / \text{early isolate (Km}^r\text{)}]_{\text{output}} / [\text{later isolate} / \text{early isolate}]_{\text{input}}$ .

### Ethics

The study was approved by the Institutional Review Board (IRB) of the Sheba Medical Center, approval numbers 7072-09-SMC and 8142-10-SMC. Informed consents were obtained and documented on each interview sheet (See [Supplementary Text](#)). Mouse experiments were conducted in line with national ethical guidelines and approved by the IRB (Approval # 933/14).

## RESULTS

### The Prevalence of Persistent NTS Infections in Israel, 1995–2012

Analysis of 48 345 documented salmonellosis cases revealed 1047 independent cases of persistent infections, based on the submission of two or more isolates of the same serovar, separated by 30 days or more (Table 1). Setting aside the less likely possibility of reinfection with the same strain over an extended period of time (see below), this analysis indicated that at least 2.2% (95% confidence interval [CI], 2.0–2.3) of all reported cases of salmonellosis in Israel are long-term infections that persist 30 days or more. The median minimal persistent period of all cases was 55 (IQR 39–91) days, and the maximal period of NTS persistence found was 8.3 years caused by an *S. Newport* infection of a 75-year-old male. Because the minimal infection duration was inferred from the time intervals between the isolation of first and the last *Salmonella* isolates, the actual period of the infection is expected to be longer. In the majority (94.2%) of the persistent cases, persistent *Salmonella* was isolated only from stool samples, in 2.2% of cases the pathogen was isolated from extra-intestinal sites and in 3.6% of cases *Salmonella* was found both in stool and extra-intestinal sites during persistence. To explain the nature of recurrent NTS isolates and to exclude reinfection of the same patient with different strains of the same serovar, we analyzed the genetic similarity of 42 recurrent isolates, obtained from 16 different patients. PFGE showed that

**Table 1. Distribution of Nontyphoidal *Salmonella* Isolates Associated With 1047 Persistent Infection Cases Between 1995 and 2012 in Israel**

| Number of Submitted Isolates | Cases | % of Cases | Median Duration of Infection in Days (Interquartile Range) | Minimum Infection Period in Days | Maximum Infection Period in Days |
|------------------------------|-------|------------|------------------------------------------------------------|----------------------------------|----------------------------------|
| 2                            | 529   | 50.5       | 49 (37–82)                                                 | 30                               | 2751 (7.5 y)                     |
| 3                            | 316   | 30.2       | 54.5 (40–86)                                               | 30                               | 3037 (8.3 y)                     |
| 4                            | 129   | 12.3       | 70 (46–104)                                                | 30                               | 1687 (4.6 y)                     |
| 5                            | 39    | 3.7        | 93 (71–134)                                                | 32                               | 417 (1.1 y)                      |
| 6                            | 20    | 1.9        | 100 (67–135)                                               | 47                               | 211                              |
| 7                            | 11    | 1.1        | 234 (188–277)                                              | 152                              | 1745 (4.7 y)                     |
| 9                            | 2     | 0.2        | 1112 (667.5–1556)                                          | 223                              | 2001 (5.4 y)                     |
| 10                           | 1     | 0.1        | 492 (492–492)                                              | 492 (1.3 y)                      | 492 (1.3 y)                      |

different isolates originated from the same person are highly similar on the genetic level, but distinct from other same-serovar strains isolated from different patients (Figure 1). As reinfection of the same host with the exact same clone separated by a long period of time is unlikely and potentially diminished even further by immunity, these results together with whole-genome sequencing (see below) support persistent infection by these NTS serovars.

#### Host and Pathogen Factors Associated With Persistent Infections

To identify host factors that may contribute to a persistent infection, a retrospective case-control study, which included 103 NTS persistent patients (cases) and 135 randomly selected controls was performed. The median minimal infection duration of the persistent cases was 66 days (IQR 40.5–111.5) and the median number of submitted isolates was four. This analysis showed that persistent NTS infections were not associated with an immunocompromised status, as only 6.8% of the cases reported poor general health (all cases and controls were human immunodeficiency virus (HIV) negative, Supplementary Table 1). Notably, 62 out of 96 (64.6%) patients that recalled the disease reported prolonged symptomatic illness with relapsing diarrhea (Table 2). To evaluate factors associated with symptomatic and asymptomatic persistent infections in comparison to random nonpersistent controls we performed multinomial logistic regression analysis (Table 2). Symptomatic, but not asymptomatic, persistent infections were significantly associated with younger age at infection (0.96 odds ratio [OR] 95% CI, .93–.99), receiving antibiotic treatment against *Salmonella* (OR 3.11 95% CI, 1.22–7.97), hospitalization due to salmonellosis (OR 3.07 95% CI, 1.1–8.55), and coinfection with other enteric pathogens (OR 11.37 95% CI, 3.07–42.08). Anemia and receiving probiotics were associated both with symptomatic and asymptomatic persistence as compared to the nonpersistent controls.

Next, we asked whether some NTS serovars are more frequently associated with human persistent infections than others, by comparing the prevalence of the different serovars among persistent (N = 1047) vs sporadic (N = 47 298) cases. The occurrence of the ubiquitous serovars Enteritidis and Typhimurium was found to be significantly lower among

persistent infections than expected by their general prevalence. On the other hand, the frequency of 4 serovars (Mbandaka, Bredeney, Infantis, and Virchow) appeared to be significantly higher among persistent infections than in sporadic cases (Table 3). These results suggest that serovar-specific genetic or ecological factors are expected to contribute to the establishment of persistent infection in humans.

#### Genetic Changes Between Early and Later Same-patient Isolates

Although PFGE of the persistent isolates has demonstrated high genetic similarity between isolates from the same patients, a few cases (patients 2, 5, 7, 9, and 10) showed subtle differences in the PFGE profile between recurrent isolates. To further characterize possible genetic changes in a higher resolution we sequenced the entire genome of 22 *S. Typhimurium* isolates obtained from 11 persistent infection patients at 2 different time points during the infection. We chose to focus on serovar Typhimurium because of its high global prevalence and the availability of an established mouse model, which allows phenotypic and virulence comparison between isolates. The minimal time interval between isolation dates was 33 days, and hereafter these time points are referred to as “early” and “later.” Phylogenetic analysis showed that in all 11 cases, the isolates from the same person always clustered together in discrete nodes with high support values, that were separate from isolates submitted by other persistent cases, and 164 *S. Typhimurium* reference strains that were included as controls to reduce random clustering (Supplementary Figure 1). These results reinforced the results obtained using the PFGE and confirmed that these recurring cases are continuous persistent infections caused by clonal lineages.

In 5 out of the 11 persistent cases we found different compositions of mobile genetic elements (MGEs) including prophages and plasmids between same-patient related isolates, explaining the nonidentical PFGE pattern found in a few examples. *S. Typhimurium* isolates obtained at early and later time points from patients B, D, I, and K presented gain and/or loss of various plasmids. Similarly, the later persistent isolate from patient E lacked a 40 Kb Gifsy-1-like prophage that was present in its early corresponding isolate (Supplementary Table 2).

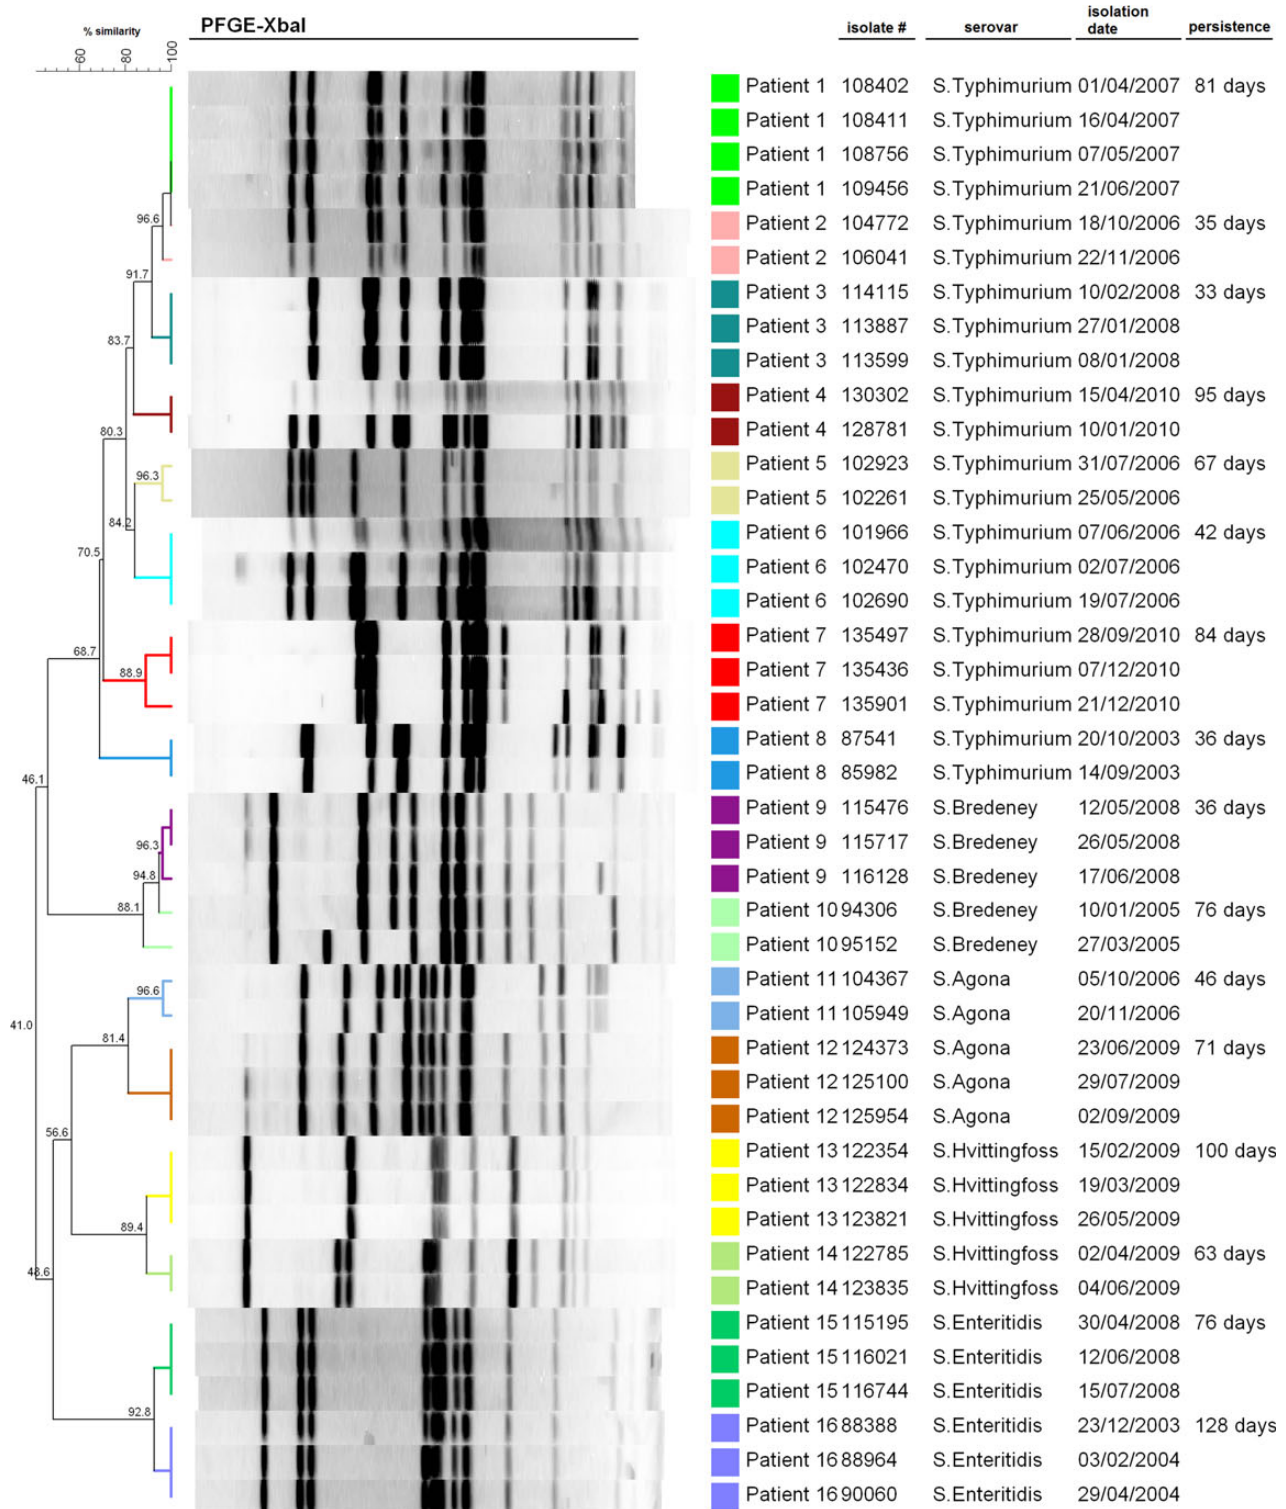

**Figure 1.** Recurrent NTS isolates obtained from the same patients are genetically related. 42 recurrent NTS isolates from 16 different patients were analyzed by PFGE using *Xba*I endonuclease. Isolate number, NTS serovar, isolation date and the minimal duration of persistence are indicated on the right. A dendrogram showing the percentage of similarity between isolates is shown on the left. Abbreviations: NTS, nontyphoidal *Salmonella*; PFGE, pulsed-field gel electrophoresis.

To further confirm changes in plasmid composition between recurrent isolates of persistent cases we applied an *S*I nuclease digest followed by PFGE of the 9 isolates obtained from patients

B, D, I, and K. This analysis confirmed the WGS data and showed clear differences in plasmid presence between related isolates from the same patients (Figure 2). Interestingly, all 3

**Table 2. Bivariate Analysis of Cases and the Controls Characteristics and a Multinomial Logistic Regression Analysis of Factors Correlating With Asymptomatic and Symptomatic Persistent Infection as Compared to the Nonpersistent Controls**

|                                                                  | Bivariate Analysis |                            |         | Multinomial Logistic Regression <sup>a,b</sup>   |         |                                                 |         |
|------------------------------------------------------------------|--------------------|----------------------------|---------|--------------------------------------------------|---------|-------------------------------------------------|---------|
|                                                                  | Controls           | Persistent Infection Cases | P Value | Persistent Asymptomatic vs. Controls OR (95% CI) | P Value | Persistent Symptomatic vs. Controls OR (95% CI) | P Value |
| Number                                                           | 135                | 103                        |         |                                                  |         |                                                 |         |
| Age at infection, years (median (IQR))                           | 2.9 (1.29–20.6)    | 0.65 (0.36–1.25)           | .002    | 0.98 (.95–1)                                     | .108    | 0.96 (.93–.99)                                  | .003    |
| Female Sex (%)                                                   | 62 (45.9)          | 47 (45.6)                  | 1       | 2.05 (.83–5.06)                                  | .121    | 1.19 (.49–2.88)                                 | .697    |
| General poor health (%)                                          | 16 (11.9)          | 7 (6.8)                    | .277    | 0.29 (.03–3.03)                                  | .301    | 1.06 (.19–5.93)                                 | .951    |
| N of household members (median (IQR))                            | 4 (3–5)            | 4 (3–5)                    | .204    | 0.83 (.6–1.16)                                   | .274    | 0.87 (.63–1.2)                                  | .408    |
| Reason for submission of multiple samples (%):                   |                    |                            |         |                                                  |         |                                                 |         |
| Do not remember                                                  | . . .              | 7 (6.8)                    |         |                                                  |         |                                                 |         |
| Symptomatic                                                      | . . .              | 62 (60.2)                  |         |                                                  |         |                                                 |         |
| To ensure clearance                                              | . . .              | 34 (33.0)                  |         |                                                  |         |                                                 |         |
| Antibiotics against <i>Salmonella</i> infection (%) <sup>a</sup> | 69 (54.8)          | 74 (74.0)                  | .004    | 1.07 (.43–2.69)                                  | .886    | 3.11 (1.22–7.97)                                | .018    |
| Anemia (%)                                                       | 22 (16.3)          | 29 (28.2)                  | .04     | 3.7 (1.3–10.52)                                  | .014    | 4.66 (1.69–12.85)                               | .003    |
| Probiotics (%)                                                   | 7 (5.2)            | 24 (23.3)                  | <.001   | 8.4 (2.1–33.58)                                  | .003    | 18.52 (5.1–67.28)                               | <.001   |
| Hospitalization/ER visit (%)                                     | 21 (15.6)          | 30 (29.1)                  | .018    | 2.35 (.75–7.32)                                  | .141    | 3.07 (1.1–8.55)                                 | .032    |
| Coinfection with other enteric pathogens (%) <sup>a</sup>        | 8 (6.2)            | 18 (17.6)                  | .011    | 2.26 (.39–13.01)                                 | .360    | 11.37 (3.07–42.08)                              | <.001   |
| Infection year (median, range)                                   | 2011 (2011–2012)   | 2010 (2000–2012)           | <.001   | 0.51 (.35–.75)                                   | .001    | 0.48 (.33–.7)                                   | <.001   |

Abbreviations: CI, confidence interval; ER, emergency room; IQR, interquartile range; OR, odds ratio.

<sup>a</sup> Complete-case analysis.

<sup>b</sup> Adjusted for: Age at infection, Sex (Female vs Male), Poor self-reported health (yes/no), Number of household members, Antibiotics against *Salmonella* infection (yes/no), Anemia (yes/no), Probiotics (yes/no), Hospitalization/ER visit (yes/no), Coinfection with other enteric pathogens (yes/no), Infection year. The full model was based on 122 controls, 33 persistent asymptomatic cases and 60 persistent symptomatic cases.

isolates from patient K did not harbor the 95 kb pSLT plasmid of *S. Typhimurium*, indicating that the pSLT virulence plasmid is not required to maintain a persistent infection in humans.

The number of core-genome single nucleotide polymorphisms (SNPs) between early and later isolates obtained from the same patient ranged from 0 to 10 per patient. Overall, 15 synonymous

**Table 3. The Leading Nontyphoidal *Salmonella* Serovars and Their Association With Sporadic and Persistent Infections in Humans in Israel**

| Rank  | Serotype    | Number of Sporadic Cases | % of Sporadic Cases | Number of Persistent Cases | % of Persistent Cases | Persistence Index <sup>a</sup> | P Value |
|-------|-------------|--------------------------|---------------------|----------------------------|-----------------------|--------------------------------|---------|
| 1     | Enteritidis | 11069                    | 23.4                | 129                        | 12.3                  | 0.5                            | .001    |
| 2     | Virchow     | 5887                     | 12.4                | 174                        | 16.6                  | 1.3                            | .001    |
| 3     | Typhimurium | 5644                     | 11.9                | 89                         | 8.5                   | 0.7                            | .001    |
| 4     | Infantis    | 5214                     | 11.0                | 156                        | 14.9                  | 1.4                            | .001    |
| 5     | Hadar       | 4000                     | 8.5                 | 84                         | 8.0                   | 0.9                            | Ns      |
| 6     | Bredeney    | 1254                     | 2.7                 | 53                         | 5.1                   | 1.9                            | .001    |
| 7     | Montevideo  | 1025                     | 2.2                 | 27                         | 2.6                   | 1.2                            | Ns      |
| 8     | Agona       | 987                      | 2.1                 | 18                         | 1.7                   | 0.8                            | Ns      |
| 9     | 9,12:l,v:-  | 891                      | 1.9                 | 28                         | 2.7                   | 1.4                            | .082    |
| 10    | Blockley    | 777                      | 1.6                 | 21                         | 2.0                   | 1.2                            | Ns      |
| 11    | Heidelberg  | 771                      | 1.6                 | 16                         | 1.5                   | 0.9                            | Ns      |
| 12    | Newport     | 763                      | 1.6                 | 22                         | 2.1                   | 1.3                            | Ns      |
| 13    | Muenchen    | 683                      | 1.4                 | 23                         | 2.2                   | 1.5                            | .061    |
| 14    | Kentucky    | 662                      | 1.4                 | 16                         | 1.5                   | 1.1                            | Ns      |
| 15    | Java        | 656                      | 1.4                 | 13                         | 1.2                   | 0.9                            | Ns      |
| 16    | Mbandaka    | 469                      | 1.0                 | 22                         | 2.1                   | 2.1                            | .001    |
| 17    | Anatum      | 438                      | 0.9                 | 9                          | 0.9                   | 0.9                            | Ns      |
| 18    | Tennessee   | 437                      | 0.9                 | 14                         | 1.3                   | 1.4                            | Ns      |
|       | Other       | 5671                     | 12.0                | 133                        | 12.7                  | 1.1                            |         |
| Total |             | 47298                    | 100                 | 1047                       | 100                   |                                |         |

<sup>a</sup> Persistence index [% of persistent cases]/ [% of sporadic cases]; P-values are based on a  $\chi^2$  test; ns, not significant.

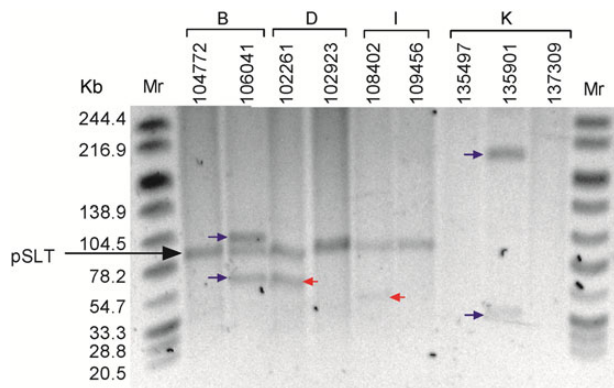

**Figure 2.** Plasmids gained and lost in related persistent isolates. Nine *S. Typhimurium* persistent isolates obtained from patients B, D, I, and K were subjected to an *S1* nuclease digest followed by PFGE. Plasmids that were found in the later isolates, but not in the early isolates are indicated by a blue arrow. Plasmids that were found in the early, but not the later, isolates are indicated by a red arrow. The prevalent approximately 95 kilobase (Kb) virulence *S. Typhimurium* plasmid, pSLT, is indicated by a black arrow. Abbreviation: PFGE, pulsed-field gel electrophoresis.

changes, 10 nonsynonymous changes, 1 premature stop-codon, and 2 changes in noncoding regions were identified within pairs of strains (pooled-average of 1 SNP/ 24 days, [Supplementary Tables 2 and 3](#)). Despite the high genetic similarity of the core genome, multiple SNPs were found to be nonsynonymous substitutions or nonsense mutations in global virulence regulatory genes including *dfsA* [12, 13] in patient A; *rpoS* [14] in patient C; *hilD* [15], *melR* [16] and a nonsynonymous mutation in *rfc* [17], in patient D; and *barA* [18] in patient F. In addition, 10 SNPs were mapped to *shdA* that was previously linked to prolonged fecal shedding [19], in patient I.

#### Phenotypic Changes Between Early and Later Same-patient Isolates

Gain or loss of large genetic elements as well as SNPs in key regulatory genes may confer substantial changes affecting host-pathogen interactions. Therefore, we next screened for phenotypic differences, between early and later isolates obtained from 11 patients with persistent *S. Typhimurium*. Comparison of these virulence-relevant phenotypes included (i) growth in minimal media ([Supplementary Figure 2](#)); (ii) biofilm formation ([Supplementary Figure 3A](#)); (iii) motility ([Supplementary Figure 3B](#)); and (iv) replication inside macrophages ([Supplementary Figure 4](#)). These assays showed, in independent cases, significant differences between early and later isolates obtained from the same patients over the course of the infection, suggesting that diversity in virulence-associated phenotypes can be maintained or acquired during persistence. In addition, antibiogram profiling demonstrated that the later isolate from patient K (135901) had a multidrug resistance (MDR) to piperacillin, ceftriaxone, and trimethoprim/sulfamethoxazole. This phenotype was consistent with the acquisition of a large plasmid, conferring extended-spectrum beta-lactamase activity, demonstrating that the

resistance profile of persistent *Salmonella* may change during the course of the infection, in a manner that could affect clinical treatment.

#### Variation in the Virulence of Persistent Isolates In-vivo

Finally, to explore whether these changes can affect *Salmonella* pathogenicity in vivo, we chose 4 pairs of isolates from patients A, D, E, and K that showed genetic and phenotypic differences in vitro and performed competitive index infections using the streptomycin pretreated mouse colitis model, which resembles a gastrointestinal disease. In 3/4 cases, these experiments demonstrated significant differences in intestinal infection between the early and the later isolates that were obtained from the same patient ([Figure 3](#)). These results show that the demonstrated genetic differences between related persistent NTS isolates can confer a significant and quantifiable change in the fitness and the pathogenicity of these variants in vivo.

#### DISCUSSION

Altogether, this study provides important clinical and public health insights, indicating that a small fraction (at least 2.2%) of NTS-infected patients continue to shed *Salmonella* for an extended period of time (months and even years). These individuals possibly serve as a human reservoir for NTS transmission. Noteworthy, about 65% of the persistent patients experienced a symptomatic disease with relapsing diarrhea, indicating that NTS persistent infection is a clinically distinct manifestation from the known asymptomatic carriage of typhoidal *Salmonella*.

A case-control study was implemented to identify host factors that correlate with persistent infections. In line with previous reports [20, 21] our study suggests that antibiotic treatment and young age are associated with prolonged symptomatic infection. We also report that hospitalization due to *Salmonella*, probiotics administration (in line with a recent double-blind, placebo-controlled clinical trial [22]) and coinfection with other enteric pathogens, independently correlate with symptomatic persistence. Moreover, the case-control study suggests a high rate of antibiotic prescription even among the nonpersistent controls (55%), despite the fact that antibiotic therapy is not recommended for an uncomplicated nontyphoid *Salmonella* infection [21, 23].

To characterize the intra-host genomic plasticity of *Salmonella* during persistent infection, we applied whole-genome sequencing of recurrent same-patient isolates. In 5 out of the 11 sequenced pairs of isolates we identified differences in MGEs, including prophages and plasmids, between isolates obtained from the same person. In at least 2 cases, these variable elements may affect virulence: loss of *gogB*, a type 3 secretion system effector gene [24] that is encoded on Gifsy-1 prophage in patient E and acquisition of an MDR plasmid in patient K. Besides differences in MGEs presence, we observed a low occurrence of SNPs, which ranged between 0 and 10 per patient. These results are consistent with the observed number of SNPs that were found

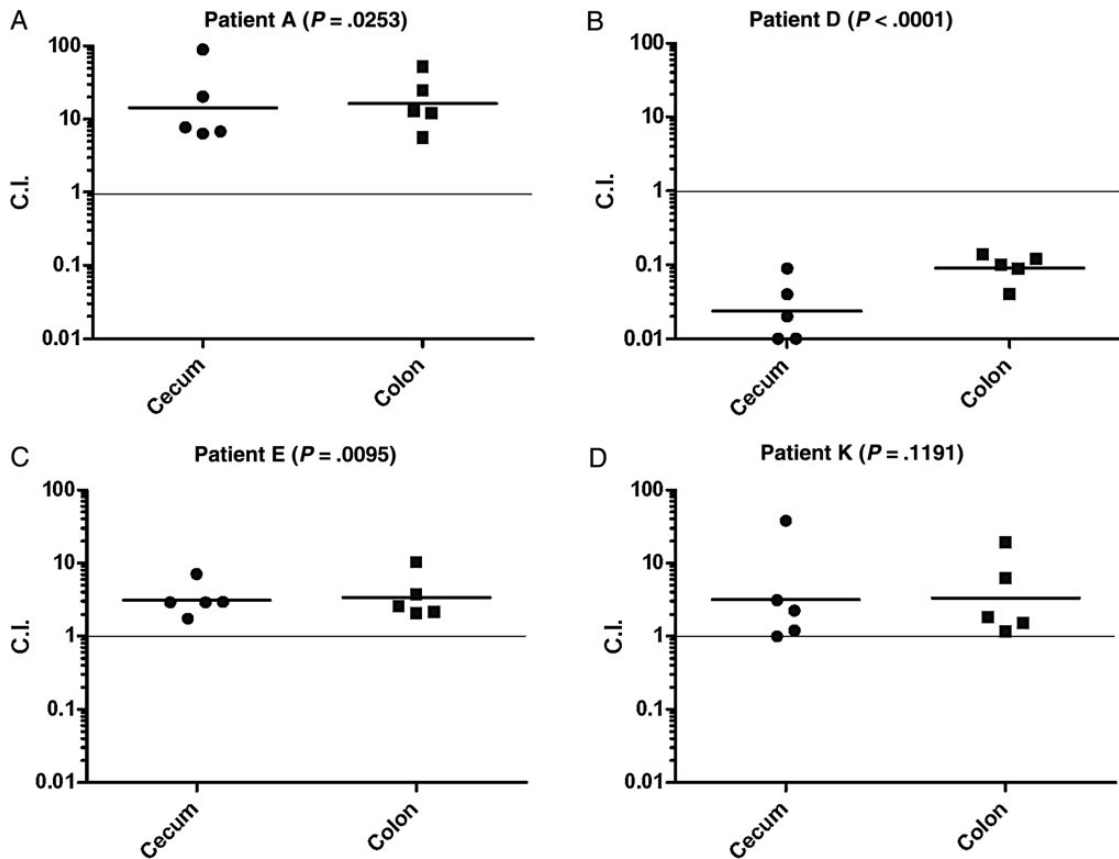

**Figure 3.** Related persistent isolates differ in their pathogenicity in vivo. Groups of 5 female C3H/HeNHsd mice were treated with streptomycin and 24 hours later were infected orally with a 1:1 mixed inoculum of early and later *S. Typhimurium* isolates ( $5 \times 10^6$ – $1 \times 10^7$  CFU from each isolate) obtained from patients A (isolate 85982 and 87541; panel A), D (102261 and 102923; panel B), E (128781 and 130302; panel C), and K (135497 and 137309; panel D). Four days post infection mice were sacrificed, and the colonization of the later isolates relative to the early isolate was determined in the cecum and colon as explained in “Materials and Methods” section. Each point shows the competitive index (C.I.) value in a single mouse, whereas the geometrical mean of each group is indicated by the horizontal line. Two-tailed 1-sample *t*-test against a theoretical mean of 1.00 was used to determine statistical significance and is shown in brackets. Abbreviation: CFU, colony-forming unit.

in a few recent studies analyzing sequential isolates obtained from patients who were persistently infected with *Burkholderia pseudomallei* [25], *E. coli* associated with asymptomatic bacteriuria [26], and invasive *S. Typhimurium* pathovar ST313 in sub-Saharan Africa [27]. Recently, Octavia *et al* also reported a similarly low SNPs rate in *S. Typhimurium* associated with short and long-term carriage [28].

Noteworthy, we did not observe a clear directionality of neither genetic nor phenotypic changes between early and later same-patient isolates. Mobile genetic elements were both lost and acquired in the later isolates leading to either improved or reduced phenotypes in comparison with the early isolates. Nevertheless, the possibility that this pathogen can alter during the persistence within the human host is intriguing. Multiple nonsynonymous SNPs were found in key virulence regulators including DksA, RpoS, HilD, MelR, and BarA. Mutations in these regulators have the potential to affect virulence and host-pathogen interactions [29–32]. It is therefore possible that these regulatory mutations increase *Salmonella* in-host fitness and are being subjected

to a positive selection leading to the emergence of specific pathoadaptive variants [33]. Phenotypic assays and infection experiments in the colitis mouse model showed, in independent cases, significant differences in the virulence of related NTS persistent isolates, indicating that such genetic variation can alter host-pathogen interactions and affect *Salmonella* virulence. We speculate that the observed gain or loss of MGEs and the SNPs in global regulators provide the pathogen with effective mechanisms to generate genetic and phenotypic heterogeneity, facilitating clonal competition and microevolution of pathoadaptive variants within the host during persistence.

Due to the retrospective study design, one cannot determine the temporal relationship between persistent infection and the identified correlating factors, which may be either the cause or the consequence of NTS persistence. Misclassification between cases and controls also cannot be ruled out as a small fraction of the controls might have had a disease for more than 30 days without seeking medical care. However, this possibility is unlikely, considering the low incidence of persistent NTS

infection. An additional limitation is the possibility of underrepresentation of nonsymptomatic persistent patients due to their possible reduced motivation toward sample submission, which may lead to an underestimation of the asymptomatic persistent infection prevalence and overrepresentation of the symptomatic persistent patients.

Despite the abovementioned limitations, we were able to demonstrate that at least 2% of the reported NTS infections in Israel result in a persistent infection with the same strain for months or even years, that is often manifested as a symptomatic relapse, illuminating a previously overlooked manifestation. Furthermore, we identified the contribution of both human and pathogen-related risk factors to this manifestation and exhibited the gain of genetic and phenotypic differences between related isolates and their potential to affect *Salmonella* pathogenicity in vivo.

### Supplementary Data

Supplementary materials are available at <http://cid.oxfordjournals.org>. Consisting of data provided by the author to benefit the reader, the posted materials are not copyedited and are the sole responsibility of the author, so questions or comments should be addressed to the author.

### Notes

**Acknowledgments.** We thank all the patients who have dedicated their time to participate in the study. We also thank Miri Bartal for the help with the interviews.

**Financial support.** This work was supported by a grant number 1096.39.11/2010 from the German-Israeli Foundation for Scientific Research and Development (GIF); and by a grant number 999/14 from the Israel Science Foundation (ISF) awarded to Ohad Gal-Mor. Michael McClelland acknowledges support from the National Institutes of Health (NIH) subcontract HHSN272200900040C, AI039557, AI052237, AI073971, AI075093, AI077645, AI083646, US Department of Agriculture (USDA) 2009-03579 and 2011-67017-30127, the Binational Agricultural Research and Development Fund and a grant from the Center for Produce Safety.

**Potential conflicts of interest.** All authors: No reported conflicts. All authors have submitted the ICMJE Form for Disclosure of Potential Conflicts of Interest. Conflicts that the editors consider relevant to the content of the manuscript have been disclosed.

### References

1. Galanis E, Lo Fo Wong DM, Patrick ME, et al. Web-based surveillance and global *Salmonella* distribution, 2000–2002. *Emerg Infect Dis* **2006**; 12:381–8.
2. Desai PT, Porwollik S, Long F, et al. Evolutionary genomics of the *Salmonella enterica* subspecies. *mBio* **2013**; 4:e00579–12.
3. Edwards RA, Olsen GJ, Maloy SR. Comparative genomics of closely related salmonellae. *Trends Microbiol* **2002**; 10:94–9.
4. Parry CM, Hien TT, Dougan G, White NJ, Farrar JJ. Typhoid fever. *N Engl J Med* **2002**; 347:1770–82.
5. Coburn B, Grassl GA, Finlay BB. *Salmonella*, the host and disease: a brief review. *Immunol Cell Biol* **2006**; 85:112–8.
6. Dongol S, Thompson CN, Clare S, et al. The microbiological and clinical characteristics of invasive *Salmonella* in gallbladders from cholecystectomy patients in Kathmandu, Nepal. *PLoS one* **2012**; 7:e47342.
7. Guibourdenche M, Roggentin P, Mikoleit M, et al. Supplement 2003–2007 (No. 47) to the White-Kauffmann-Le Minor scheme. *Res Microbiol* **2010**; 161:26–9.
8. Marzel A, Desai PT, Nissan I, et al. Integrative analysis of salmonellosis in Israel, 1995–2012 reveals association of serovar 9, 12:1, v:- with extraintestinal infections, dissemination of endemic *S. typhimurium* DT104 biotypes and a severe under-reporting of outbreaks. *J Clin Microbiol* **2014**. JCM. 00399-14.
9. Ribot EM, Fair MA, Gautom R, et al. Standardization of pulsed-field gel electrophoresis protocols for the subtyping of *Escherichia coli* O157:H7, *Salmonella*, and *Shigella* for PulseNet. *Foodborne Pathog Dis* **2006**; 3:59–67.
10. Zerbino DR, Birney E. Velvet: algorithms for de novo short read assembly using de Bruijn graphs. *Genome Res* **2008**; 18:821–9.
11. Stamatakis A. RAxML-VI-HPC: maximum likelihood-based phylogenetic analyses with thousands of taxa and mixed models. *Bioinformatics* **2006**; 22:2688–90.
12. Webb C, Moreno M, Wilmes-Riesenberg M, Curtiss R III, Foster JW. Effects of DksA and ClpP protease on sigma S production and virulence in *Salmonella typhimurium*. *Mol Microbiol* **1999**; 34:112–23.
13. Azriel S, Goren A, Rahav G, Gal-Mor O. The stringent response regulator DksA is required for *Salmonella typhimurium* growth in minimal media, motility, biofilm formation and intestinal colonization. *Infect Immun* **2016**; 375–84.
14. Lee IS, Lin J, Hall HK, Bearson B, Foster JW. The stationary-phase sigma factor sigma S (RpoS) is required for a sustained acid tolerance response in virulent *Salmonella typhimurium*. *Mol Microbiol* **1995**; 17:155–67.
15. Ellermeier JR, Schlauch JM. Adaptation to the host environment: regulation of the SPI1 type III secretion system in *Salmonella enterica* serovar Typhimurium. *Curr Opin Microbiol* **2007**; 10:24–9.
16. Webster C, Gardner L, Busby S. The *Escherichia coli* melR gene encodes a DNA-binding protein with affinity for specific sequences located in the melibiose-operon regulatory region. *Gene* **1989**; 83:207–13.
17. Kong Q, Yang J, Liu Q, Alamuri P, Roland KL, Curtiss R 3rd. Effect of deletion of genes involved in lipopolysaccharide core and O-antigen synthesis on virulence and immunogenicity of *Salmonella enterica* serovar typhimurium. *Infect Immun* **2011**; 79:4227–39.
18. Teplitski M, Goodier RI, Ahmer BM. Pathways leading from BarA/SirA to motility and virulence gene expression in *Salmonella*. *J Bacteriol* **2003**; 185:7257–65.
19. Kingsley RA, van Amsterdam K, Kramer N, Baumlerr AJ. The shdA gene is restricted to serotypes of *Salmonella enterica* subspecies I and contributes to efficient and prolonged fecal shedding. *Infect Immun* **2000**; 68:2720–7.
20. Buchwald DS, Blaser MJ. A review of human salmonellosis: II. Duration of excretion following infection with nontyphi *Salmonella*. *Rev Infect Dis* **1984**; 6:345–56.
21. Sirinavin S, Garner P. Antibiotics for treating salmonella gut infections. *Cochrane Database Syst Rev* **1999**; doi:10.1002/14651858.CD001167.
22. Lonnermark E, Lappas G, Friman V, Wold AE, Backhaus E, Adlerberth I. Effects of probiotic intake and gender on nontyphoid *Salmonella* infection. *J Clin Gastroenterol* **2015**; 49:116–23.
23. Hohmann EL. Approach to the patient with nontyphoidal *Salmonella* in a stool culture. Available at: <http://www.uptodate.com/contents/approach-to-the-patient-with-nontyphoidal-salmonella-in-a-stool-culture>. Accessed 27 April 2015.
24. Coombes BK, Wickham ME, Brown NF, et al. Genetic and molecular analysis of GogB, a phage-encoded type III-secreted substrate in *Salmonella enterica* serovar typhimurium with autonomous expression from its associated phage. *J Mol Biol* **2005**; 348:817–30.
25. Hayden HS, Lim R, Brittnacher MJ, et al. Evolution of *Burkholderia pseudomallei* in recurrent melioidosis. *PLoS One* **2012**; 7:e36507.
26. Zdzarski J, Brzuszkiewicz E, Wullt B, et al. Host imprints on bacterial genomes—rapid, divergent evolution in individual patients. *PLoS Pathog* **2010**; 6:e1001078.
27. Okoro CK, Kingsley RA, Quail MA, et al. High-resolution single nucleotide polymorphism analysis distinguishes recrudescence and reinfection in recurrent invasive nontyphoidal *Salmonella typhimurium* disease. *Clin Infect Dis* **2012**; 54:955–63.
28. Octavia S, Wang Q, Tanaka MM, Sintchenko V, Lan R. Genomic variability of serial human isolates of *Salmonella enterica* serovar Typhimurium associated with prolonged carriage. *J Clin Microbiol* **2015**; 53:3507–14.
29. Ellermeier CD, Ellermeier JR, Schlauch JM. HilD, HilC and RtsA constitute a feed forward loop that controls expression of the SPI1 type three secretion system regulator hilA in *Salmonella enterica* serovar Typhimurium. *Mol Microbiol* **2005**; 57:691–705.
30. Martinez LC, Yakhnin H, Camacho MI, et al. Integration of a complex regulatory cascade involving the SirA/BarA and Csr global regulatory systems that controls expression of the *Salmonella* SPI-1 and SPI-2 virulence regulons through HilD. *Mol Microbiol* **2011**; 80:1637–56.
31. Rice CJ, Ramachandran VK, Shearer N, Thompson A. Transcriptional and Post-Transcriptional Modulation of SPI1 and SPI2 Expression by ppGpp, RpoS and DksA in *Salmonella enterica* sv Typhimurium. *PLoS One* **2015**; 10:e0127523.
32. Rychlik I, Barrow PA. *Salmonella* stress management and its relevance to behaviour during intestinal colonisation and infection. *FEMS Microbiol Rev* **2005**; 29:1021–40.
33. Koskiniemi S, Gibbons HS, Sandegren L, et al. Pathoadaptive mutations in *Salmonella enterica* isolated after serial passage in mice. *PLoS One* **2013**; 8:e70147.
